# Supplementary material for: Three novel indium MOFs derived from diphenic acid: synthesis, crystal structures and supramolecular chemistry
Source: Royal Society of Chemistry journal article supplement (doi:10.1039/c1ce05196b), 2011-01-01
Supplement: c1ce05196b.pdf [file c1ce05196b.pdf]

**Supporting Information.** Tables S1-S5 and Figures S1-S6. This material is available free of charge via the Internet at <http://pubs.acs.org>.

**Table S1. Crystal data and structure refinement for Compound 1.**

|                                   |                                             |                               |
|-----------------------------------|---------------------------------------------|-------------------------------|
| Identification code               | Compound1                                   |                               |
| Empirical formula                 | C66 H42 In2 N4 O13                          |                               |
| Formula weight                    | 1328.66                                     |                               |
| Temperature                       | 295(2) K                                    |                               |
| Wavelength                        | 0.71073 Å                                   |                               |
| Crystal system                    | Triclinic                                   |                               |
| Space group                       | P-1                                         |                               |
| Unit cell dimensions              | a = 9.835(2) Å                              | $\alpha = 96.492(4)^\circ$ .  |
|                                   | b = 13.839(3) Å                             | $\beta = 100.320(5)^\circ$ .  |
|                                   | c = 21.881(5) Å                             | $\gamma = 104.967(4)^\circ$ . |
| Volume                            | 2790.5(11) Å <sup>3</sup>                   |                               |
| Z                                 | 2                                           |                               |
| Density (calculated)              | 1.579 Mg/m <sup>3</sup>                     |                               |
| Absorption coefficient            | 0.899 mm <sup>-1</sup>                      |                               |
| F(000)                            | 1332                                        |                               |
| Crystal size                      | 0.30 x 0.25 x 0.20 mm <sup>3</sup>          |                               |
| Theta range for data collection   | 0.96 to 20.81°.                             |                               |
| Index ranges                      | -9 ≤ h ≤ 9, -13 ≤ k ≤ 13, -21 ≤ l ≤ 21      |                               |
| Reflections collected             | 12374                                       |                               |
| Independent reflections           | 5647 [R(int) = 0.1929]                      |                               |
| Completeness to theta = 20.81°    | 96.7 %                                      |                               |
| Absorption correction             | Semi-empirical from equivalents             |                               |
| Max. and min. transmission        | 0.835 and 0.764                             |                               |
| Refinement method                 | Full-matrix least-squares on F <sup>2</sup> |                               |
| Data / restraints / parameters    | 5647 / 0 / 775                              |                               |
| Goodness-of-fit on F <sup>2</sup> | 1.069                                       |                               |
| Final R indices [I > 2σ(I)]       | R1 = 0.0758, wR2 = 0.1700                   |                               |
| R indices (all data)              | R1 = 0.1252, wR2 = 0.2108                   |                               |
| Largest diff. peak and hole       | 1.094 and -0.964 e.Å <sup>-3</sup>          |                               |

**Table S2. Crystal data and structure refinement for Compound 2.**

|                                   |                                             |                               |
|-----------------------------------|---------------------------------------------|-------------------------------|
| Identification code               | Compound2                                   |                               |
| Empirical formula                 | C19 H13.5 In N O5.25                        |                               |
| Formula weight                    | 454.38                                      |                               |
| Temperature                       | 296(2) K                                    |                               |
| Wavelength                        | 1.54178 Å                                   |                               |
| Crystal system                    | Monoclinic                                  |                               |
| Space group                       | P2(1)/n                                     |                               |
| Unit cell dimensions              | a = 10.7789(3) Å                            | $\alpha = 90^\circ$ .         |
|                                   | b = 8.2923(2) Å                             | $\beta = 95.0310(10)^\circ$ . |
|                                   | c = 19.6538(5) Å                            | $\gamma = 90^\circ$ .         |
| Volume                            | 1749.93(8) Å <sup>3</sup>                   |                               |
| Z                                 | 4                                           |                               |
| Density (calculated)              | 1.725 Mg/m <sup>3</sup>                     |                               |
| Absorption coefficient            | 11.083 mm <sup>-1</sup>                     |                               |
| F(000)                            | 901                                         |                               |
| Crystal size                      | 0.08 x 0.04 x 0.04 mm <sup>3</sup>          |                               |
| Theta range for data collection   | 4.52 to 63.28°.                             |                               |
| Index ranges                      | -12 ≤ h ≤ 12, -9 ≤ k ≤ 9, -22 ≤ l ≤ 18      |                               |
| Reflections collected             | 22655                                       |                               |
| Independent reflections           | 2832 [R(int) = 0.0361]                      |                               |
| Completeness to theta = 63.28°    | 99.1 %                                      |                               |
| Absorption correction             | None                                        |                               |
| Max. and min. transmission        | 0.6655 and 0.4709                           |                               |
| Refinement method                 | Full-matrix least-squares on F <sup>2</sup> |                               |
| Data / restraints / parameters    | 2832 / 1 / 230                              |                               |
| Goodness-of-fit on F <sup>2</sup> | 1.065                                       |                               |
| Final R indices [I > 2σ(I)]       | R1 = 0.0739, wR2 = 0.2276                   |                               |
| R indices (all data)              | R1 = 0.0918, wR2 = 0.2452                   |                               |
| Largest diff. peak and hole       | 1.686 and -1.126 e.Å <sup>-3</sup>          |                               |

**Table S3. Crystal data and structure refinement for Compound 3.**

|                                   |                                                                                                          |
|-----------------------------------|----------------------------------------------------------------------------------------------------------|
| Identification code               | incompound3                                                                                              |
| Empirical formula                 | C <sub>38</sub> H <sub>27</sub> In N <sub>2</sub> O <sub>9</sub>                                         |
| Formula weight                    | 770.44                                                                                                   |
| Temperature                       | 293(2) K                                                                                                 |
| Wavelength                        | 0.71073 Å                                                                                                |
| Crystal system                    | Orthorhombic                                                                                             |
| Space group                       | P2(1)2(1)2(1)                                                                                            |
| Unit cell dimensions              | a = 12.8039(9) Å $\alpha$ = 90°.<br>b = 14.0375(9) Å $\beta$ = 90°.<br>c = 18.3577(12) Å $\gamma$ = 90°. |
| Volume                            | 3299.5(4) Å <sup>3</sup>                                                                                 |
| Z                                 | 4                                                                                                        |
| Density (calculated)              | 1.551 Mg/m <sup>3</sup>                                                                                  |
| Absorption coefficient            | 0.778 mm <sup>-1</sup>                                                                                   |
| F(000)                            | 1560                                                                                                     |
| Crystal size                      | 0.40 x 0.30 x 0.20 mm <sup>3</sup>                                                                       |
| Theta range for data collection   | 1.83 to 28.32°.                                                                                          |
| Index ranges                      | -16 ≤ h ≤ 16, -18 ≤ k ≤ 18, -24 ≤ l ≤ 24                                                                 |
| Reflections collected             | 30563                                                                                                    |
| Independent reflections           | 8003 [R(int) = 0.0594]                                                                                   |
| Completeness to theta = 28.32°    | 98.9 %                                                                                                   |
| Absorption correction             | None                                                                                                     |
| Refinement method                 | Full-matrix least-squares on F <sup>2</sup>                                                              |
| Data / restraints / parameters    | 8003 / 2 / 559                                                                                           |
| Goodness-of-fit on F <sup>2</sup> | 1.073                                                                                                    |
| Final R indices [I > 2σ(I)]       | R1 = 0.0398, wR2 = 0.0621                                                                                |
| R indices (all data)              | R1 = 0.0519, wR2 = 0.0646                                                                                |
| Absolute structure parameter      | 0.002(15)                                                                                                |
| Largest diff. peak and hole       | 0.764 and -0.395 e.Å <sup>-3</sup>                                                                       |

**Table S4. Crystal data and structure refinement for Compound 4.**

|                                   |                                                                                                                                                                              |
|-----------------------------------|------------------------------------------------------------------------------------------------------------------------------------------------------------------------------|
| Identification code               | InCompound4                                                                                                                                                                  |
| Empirical formula                 | C76 H54 In2 N4 O18                                                                                                                                                           |
| Formula weight                    | 1540.87                                                                                                                                                                      |
| Temperature                       | 295(2) K                                                                                                                                                                     |
| Wavelength                        | 0.71073 Å                                                                                                                                                                    |
| Crystal system                    | Triclinic                                                                                                                                                                    |
| Space group                       | P-1                                                                                                                                                                          |
| Unit cell dimensions              | a = 9.9495(6) Å                      α = 82.5430(10)°.<br>b = 13.0898(8) Å                      β = 85.4720(10)°.<br>c = 13.2297(8) Å                      γ = 80.5710(10)°. |
| Volume                            | 1682.4(12) Å <sup>3</sup>                                                                                                                                                    |
| Z                                 | 1                                                                                                                                                                            |
| Density (calculated)              | 1.521 Mg/m <sup>3</sup>                                                                                                                                                      |
| Absorption coefficient            | 0.763 mm <sup>-1</sup>                                                                                                                                                       |
| F(000)                            | 780                                                                                                                                                                          |
| Crystal size                      | 0.30 x 0.25 x 0.20 mm <sup>3</sup>                                                                                                                                           |
| Theta range for data collection   | 1.59 to 26.37°.                                                                                                                                                              |
| Index ranges                      | -12 ≤ h ≤ 12, -16 ≤ k ≤ 16, -16 ≤ l ≤ 16                                                                                                                                     |
| Reflections collected             | 13615                                                                                                                                                                        |
| Independent reflections           | 6578 [R(int) = 0.0425]                                                                                                                                                       |
| Completeness to theta = 26.37°    | 95.6 %                                                                                                                                                                       |
| Absorption correction             | Semi-empirical from equivalents                                                                                                                                              |
| Max. and min. transmission        | 0.8624 and 0.8035                                                                                                                                                            |
| Refinement method                 | Full-matrix least-squares on F <sup>2</sup>                                                                                                                                  |
| Data / restraints / parameters    | 6578 / 2 / 460                                                                                                                                                               |
| Goodness-of-fit on F <sup>2</sup> | 1.054                                                                                                                                                                        |
| Final R indices [I > 2σ(I)]       | R1 = 0.0405, wR2 = 0.0860                                                                                                                                                    |
| R indices (all data)              | R1 = 0.0610, wR2 = 0.0922                                                                                                                                                    |
| Largest diff. peak and hole       | 0.643 and -0.435 e.Å <sup>-3</sup>                                                                                                                                           |

**Table S5. Crystal data and structure refinement for Compound 5.**

|                                   |                                             |                              |
|-----------------------------------|---------------------------------------------|------------------------------|
| Identification code               | Incompound5                                 |                              |
| Empirical formula                 | C76 H50 In2 N4 O16                          |                              |
| Formula weight                    | 1504.84                                     |                              |
| Temperature                       | 295(2) K                                    |                              |
| Wavelength                        | 0.71073 Å                                   |                              |
| Crystal system                    | Triclinic                                   |                              |
| Space group                       | P-1                                         |                              |
| Unit cell dimensions              | a = 10.6135(12) Å                           | $\alpha = 75.745(2)^\circ$ . |
|                                   | b = 11.6513(13) Å                           | $\beta = 68.609(2)^\circ$ .  |
|                                   | c = 14.0949(15) Å                           | $\gamma = 88.736(2)^\circ$ . |
| Volume                            | 1568.5(3) Å <sup>3</sup>                    |                              |
| Z                                 | 1                                           |                              |
| Density (calculated)              | 1.593 Mg/m <sup>3</sup>                     |                              |
| Absorption coefficient            | 0.814 mm <sup>-1</sup>                      |                              |
| F(000)                            | 760                                         |                              |
| Crystal size                      | 0.30 x 0.25 x 0.20 mm <sup>3</sup>          |                              |
| Theta range for data collection   | 1.81 to 28.85°.                             |                              |
| Index ranges                      | -13 ≤ h ≤ 13, -15 ≤ k ≤ 15, -18 ≤ l ≤ 18    |                              |
| Reflections collected             | 13544                                       |                              |
| Independent reflections           | 7022 [R(int) = 0.0527]                      |                              |
| Completeness to theta = 28.85°    | 85.3 %                                      |                              |
| Absorption correction             | Semi-empirical from equivalents             |                              |
| Refinement method                 | Full-matrix least-squares on F <sup>2</sup> |                              |
| Data / restraints / parameters    | 7022 / 0 / 542                              |                              |
| Goodness-of-fit on F <sup>2</sup> | 1.049                                       |                              |
| Final R indices [I > 2σ(I)]       | R1 = 0.0652, wR2 = 0.0979                   |                              |
| R indices (all data)              | R1 = 0.1009, wR2 = 0.1072                   |                              |

Largest diff. peak and hole      0.994 and -0.831 e.Å<sup>-3</sup>

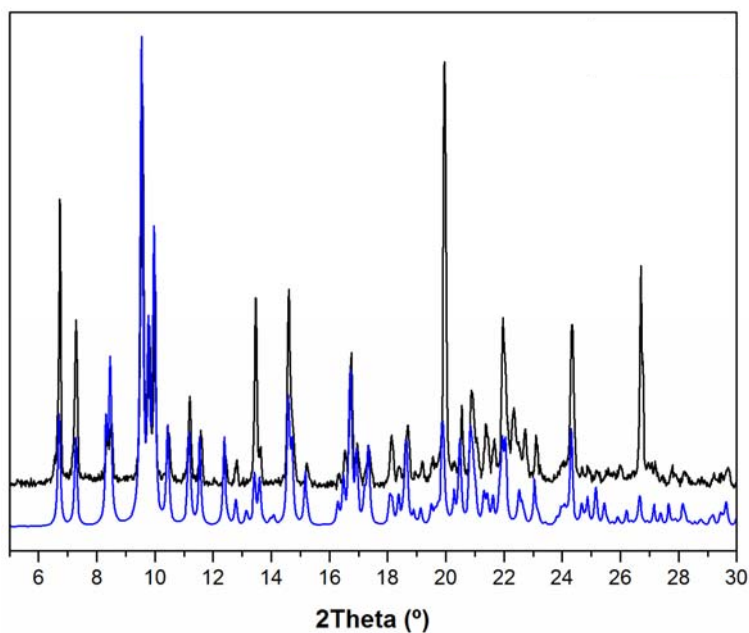

**Figure S1.** Comparison of the experimental PXRD patterns for as-synthesized compound **1** (black) with the simulated pattern from single-crystal X-Ray data (blue).

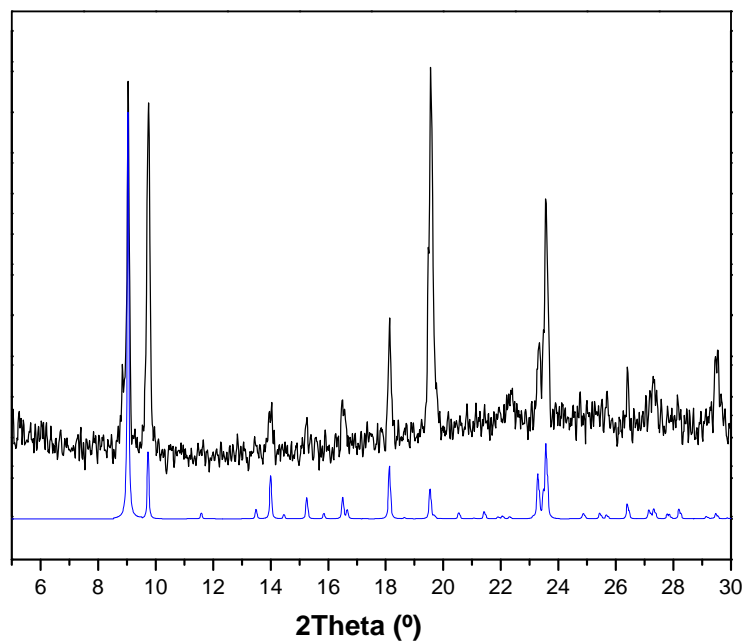

**Figure S2.** Comparison of the experimental PXRD patterns for as-synthesized compound **2** (black) with the simulated pattern from single-crystal X-Ray data (blue).

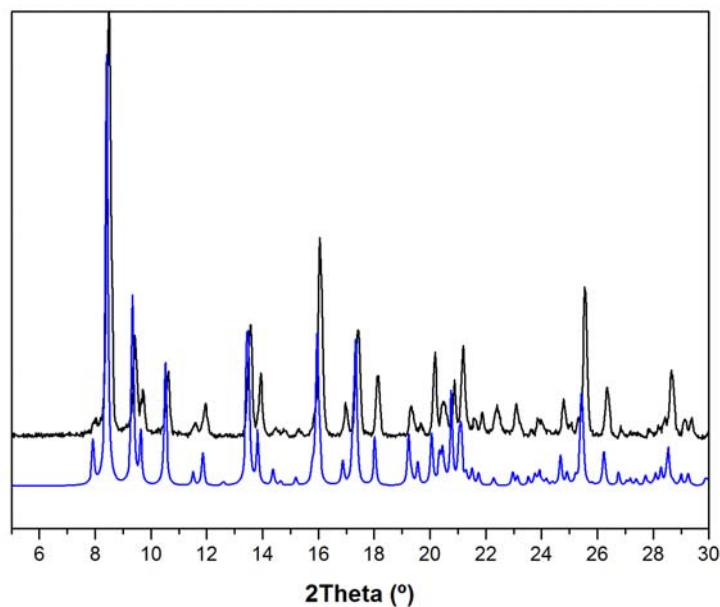

**Figure S3.** Comparison of the experimental PXRD patterns for as-synthesized compound **3** (black) with the simulated pattern from single-crystal X-Ray data (blue).

TGA curves for **1-3** are shown in **Figure S4**, which reveal the thermal stability of these compounds up to ~300 °C (under N<sub>2</sub>). In order to check their structural stability after losing water molecules, XRPD patterns of the samples heated at 250°C were recorded (**Figure S5-S7**).

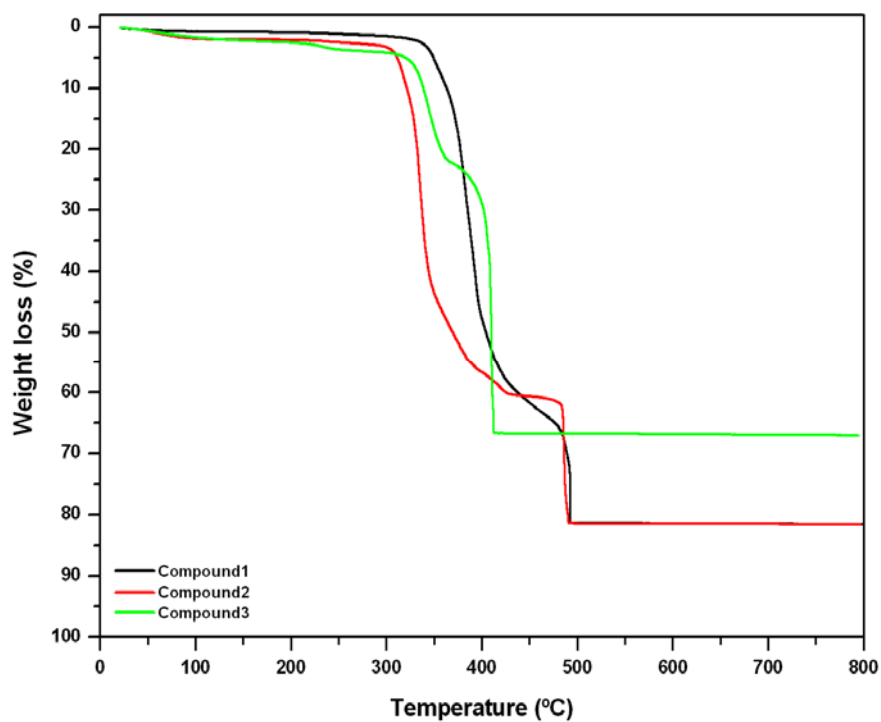

**Figure S4.** TGA profiles of **1**, **2** and **3** compounds performed under N<sub>2</sub> (flow of 50 mL.min<sup>-1</sup>) with a heating rate of 5 °C/min.

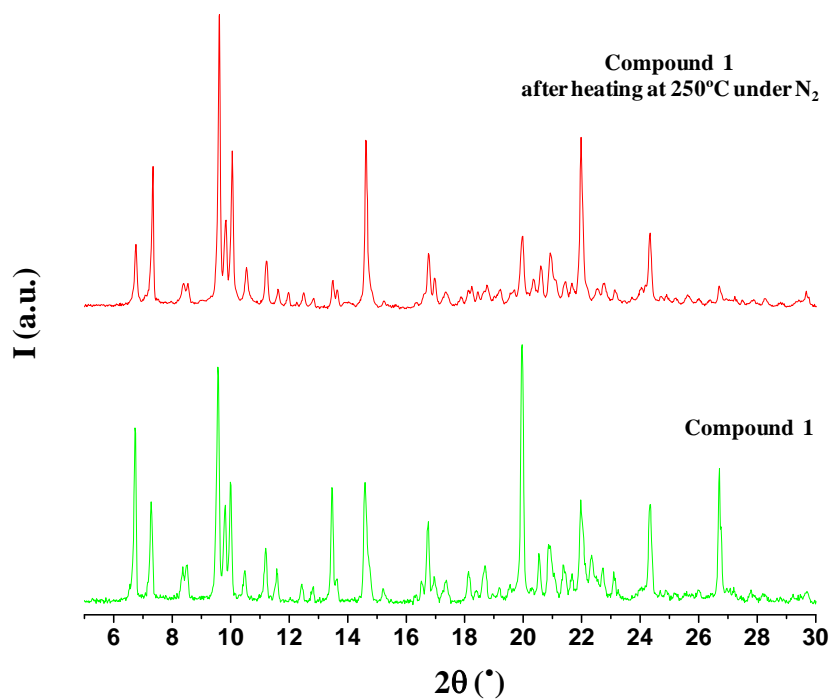

**Figure S5.** Comparison of the experimental XRPD pattern of **1** after heating a 250°C under N<sub>2</sub>, with the pattern of the as-synthesized sample.

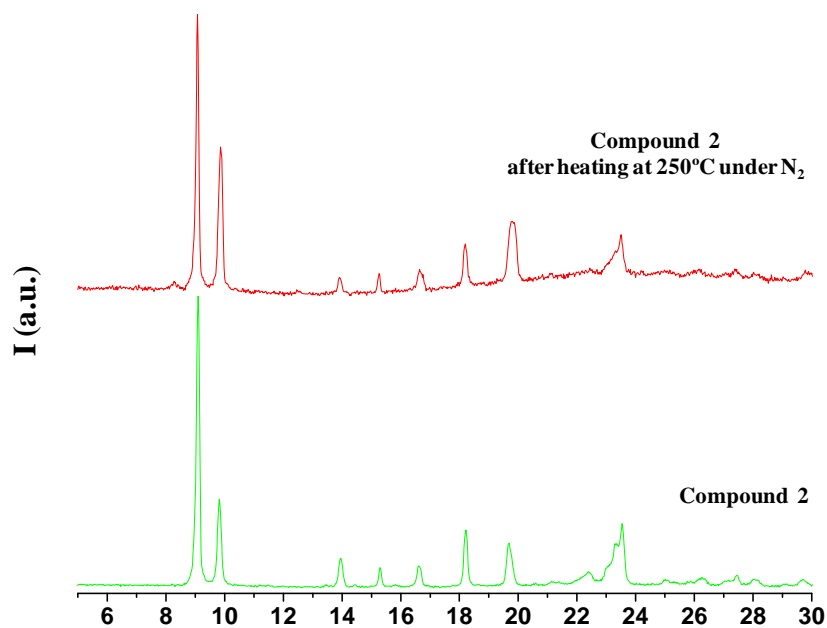



**Figure S6.** Comparison of the experimental XRPD pattern of **2** after heating a 250°C under N<sub>2</sub>, with the pattern of the as-synthesized sample.

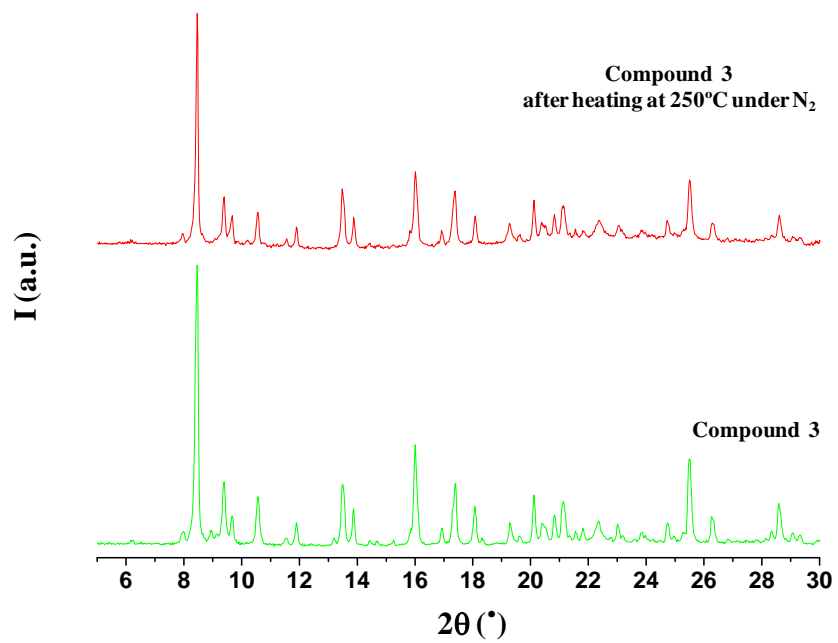

**Figure S7.** Comparison of the experimental XRPD pattern of **3** after heating a 250°C under N<sub>2</sub>, with the pattern of the as-synthesized sample.

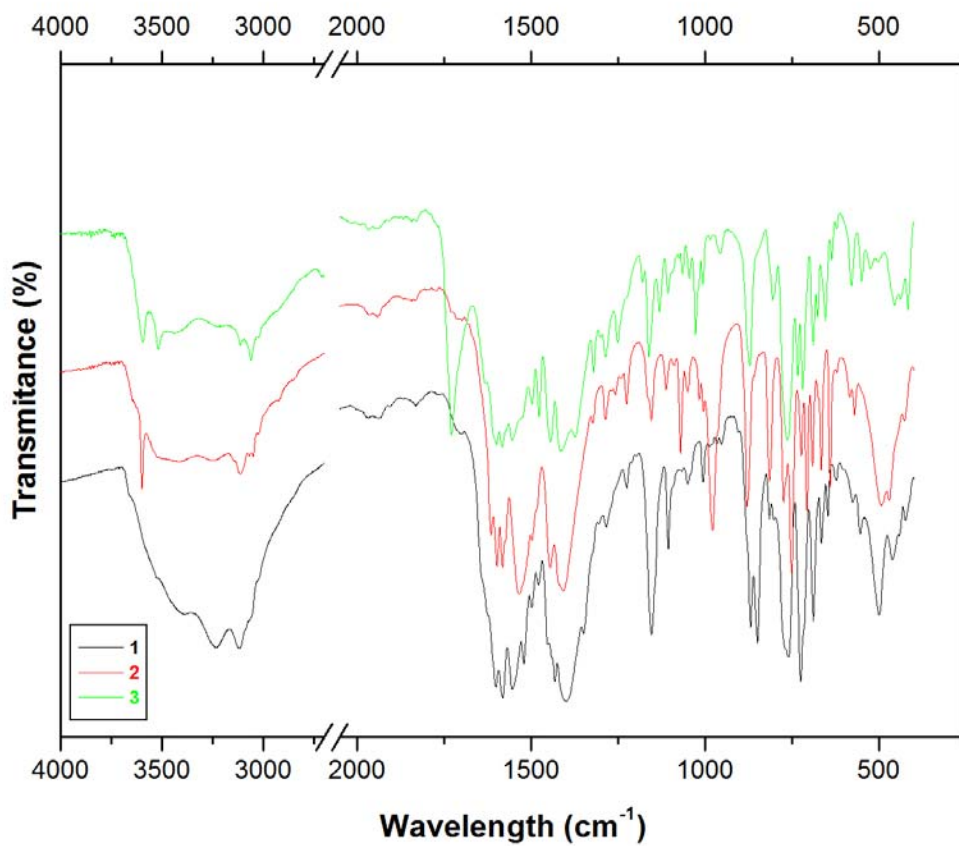

**Figure S8.** FTIR spectra of compounds 1-3 in the 4000-250 cm<sup>-1</sup> range.
